# Supplementary material for: Ligand effect on the synthesis of emission-tunable near-infrared Ag2S quantum dots
Source: Royal Society of Chemistry journal article supplement (doi:10.1039/c7nj01049d), 2017-01-01
Supplement: c7nj01049d1.pdf [file c7nj01049d1.pdf]

## Electronic Supplementary Information

### **Ligand effect on the synthesis of emission-tunable near-infrared Ag<sub>2</sub>S quantum dots**

Peng Jiang<sup>a, b</sup> and Zilin Chen<sup>\*, a</sup>

<sup>a</sup> Key Laboratory of Combinatorial Biosynthesis and Drug Discovery (Wuhan University),  
Ministry of Education, and Wuhan University School of Pharmaceutical Sciences, Wuhan 430071,  
China.

\*Email: [chenzl@whu.edu.cn](mailto:chenzl@whu.edu.cn)

<sup>b</sup> Hubei Key Laboratory of Medical Information Analysis and Tumor Diagnosis &  
Treatment

When the metal ions coordinated by ligand, its standard redox potential ( $\varphi^\theta$ ) will change (eqs 1-3). It can be calculated according to Nernst equation (eq 4):

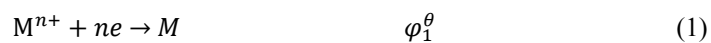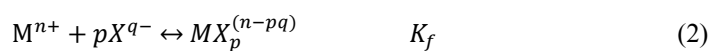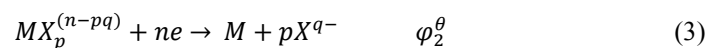

$$\varphi_2^\theta = \varphi_1^\theta - \frac{RT}{nF} \ln K_f \quad (4)$$

where  $\varphi_2^\theta$  and  $\varphi_1^\theta$  are representative of the standard redox potential of metal ions and the metal-ligand complex, respectively, R is the ideal gas constant, T is the thermodynamic temperature, n is the number of the transferred electrons, F is the Faraday constant, and  $K_f$  is stability constant of metal-ligand complex. It can be inferred from eq 4 that the  $\varphi^\theta$  of metal ions is lower when  $K_f$  is higher, and the metal ions will be more difficult to be reduced. Therefore, the addition of 1-octanethiol will suppress the reduction of  $Ag^+$  ions to Ag nanocrystals.

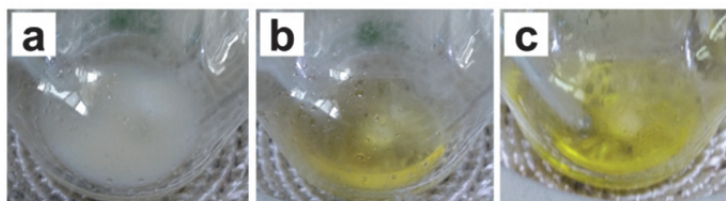

**Fig. S1** Photographs of the reaction solution (a) after adding 1-octanethiol into the Ag(I) solution at (a) 80 °C, (b) further heated to 110 °C and (c) heated to 160 °C. After the addition of 1-octanethiol, the colorless Ag(I) solution became white turbid due to the formation of Ag(I)-thiolate complex and further changed to yellow clear at above 110 °C, which was similar to the reported thiol-based synthesis of Ag<sub>2</sub>S QDs.<sup>[1]</sup> Different from the reaction without 1-octanethiol, the Ag(I) solution containing 1-octanethiol did not turn brown even at 160 °C.

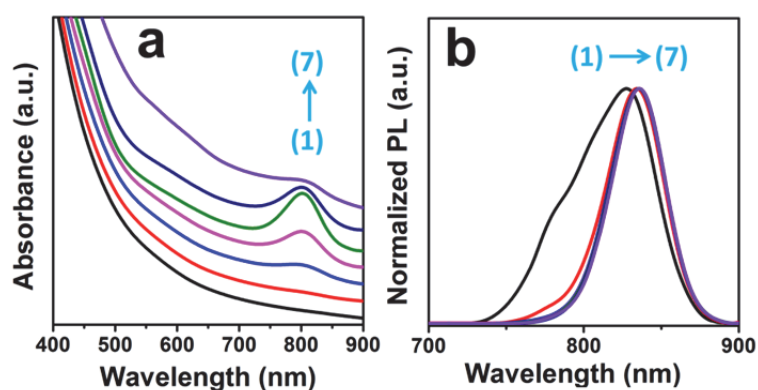

**Fig. S2** Temporal evolution of absorption spectra and PL spectra of Ag<sub>2</sub>S QDs. The growth time: (1) 5 s, (2) 30 s, (3) 1 min, (4) 5 min, (5) 15 min, (6) 30 min, (7) 60 min. Ligand composition: 0.5 M of OAc, 0.5 M of OAm and 0.04 M of RSH. Injection temperature: 160 °C.

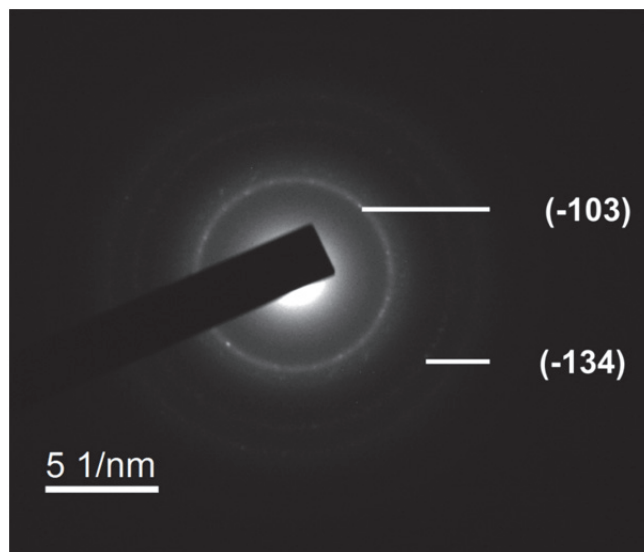

**Fig. S3** Selected area electron diffraction (SAED) image of the as-prepared Ag<sub>2</sub>S QDs.

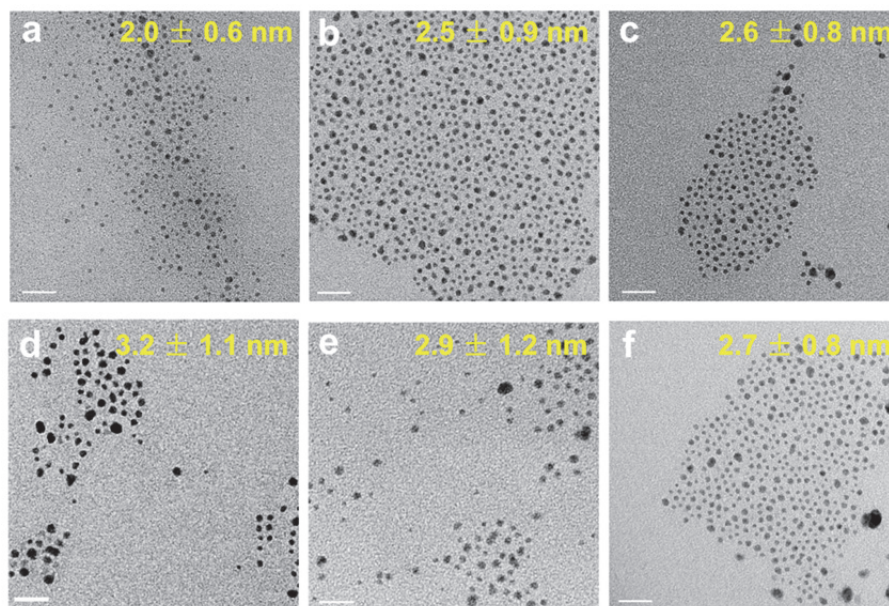

**Fig. S4** TEM images (scale bar: 20 nm) of Ag<sub>2</sub>S QDs grown with different ligands: (a, d) 0.5 M OAc and 0.04 M RSH, (b, e) 0.5 M OAm and 0.04 M RSH, (c, f) 0.5 M OAm, 0.5 M OAc and 0.04 M RSH. The growth time (a-c): 5 s, (d-f): 60 min. The RSH refers to 1-octanethiol.

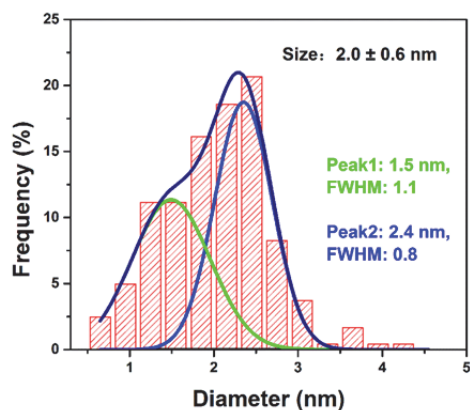

**Fig. S5** Size distribution of  $\text{Ag}_2\text{S}$  QDs corresponded to the sample a in Fig. S4. The size distribution could be fitted to two peaks at 1.5 nm and 2.4 nm.

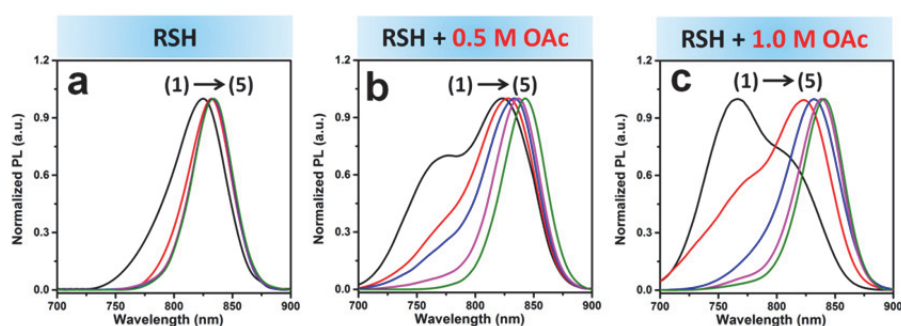

**Fig. S6** Temporal evolution of PL spectra of  $\text{Ag}_2\text{S}$  QDs grown with identical 1-octanethiol concentration (0.04 M) and different OAc concentration (0.0 M, 0.5 M and 1.0 M). The growth time (1-5): 5 s, 5 min, 15 min, 30 min and 60 min.

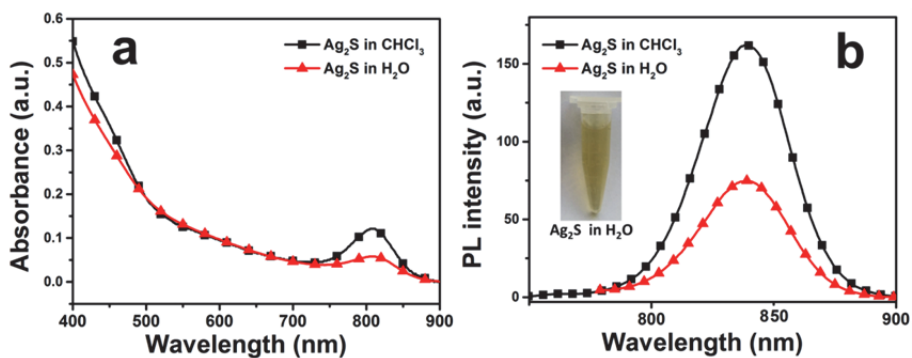

**Fig. S7** (a) Absorption and (b) PL spectra of the  $\text{Ag}_2\text{S}$  QDs before and after transferred from chloroform to water and the photograph of the water-soluble  $\text{Ag}_2\text{S}$  QDs (b, inset).

## References

- [1] Jiang P, Wang R and Chen Z L 2015 *RSC Adv.* **5** 56789
